# Supplementary material for: mRNA induced expression of human angiotensin-converting enzyme 2 in mice for the study of the adaptive immune response to severe acute respiratory syndrome coronavirus 2
Source: PubMed Central journal article supplement (PMC7773324; doi:10.1371/journal.ppat.1009163), 2020-12-16
Supplement: ppat.1009163.s010.pdf [file ppat.1009163.s010.pdf]

| SARS-CoV S Protein Peptide Array (Catalog No. NR-2669) |                     |             |       |
|--------------------------------------------------------|---------------------|-------------|-------|
| Peptide                                                | Amino acid sequence | Domain pool | Plate |
| 1                                                      | MFIFLLFLTLTSGSDLDR  | S1 N-Term   | 1     |
| 2                                                      | TLTSGSDLDRCTTFDDV   | S1 N-Term   | 1     |
| 3                                                      | LDRCTTFDDVQAPNYTQH  | S1 N-Term   | 1     |
| 4                                                      | DVQAPNYTQHTSSMRGVY  | S1 N-Term   | 1     |
| 5                                                      | QHTSSMRGVYYPDEIFR   | S1 N-Term   | 1     |
| 6                                                      | GVYYPDEIFRSDTLYL    | S1 N-Term   | 1     |
| 7                                                      | EIFRSDTLYLTDQLFLPF  | S1 N-Term   | 1     |
| 8                                                      | YLTQDLFLPFYSNVTGFH  | S1 N-Term   | 1     |
| 9                                                      | PFYSNVTGFHTINHTF    | S1 N-Term   | 1     |
| 10                                                     | TGFHTINHTFGNPVIFPK  | S1 N-Term   | 1     |
| 11                                                     | TFGNPVIKFDGIYFAA    | S1 N-Term   | 1     |
| 12                                                     | PFKFDGIYFAATEKSNVVR | S1 N-Term   | 1     |
| 13                                                     | AATEKSNVVRGWVFGSTM  | S1 N-Term   | 1     |
| 14                                                     | VRGWVFGSTMNKSQSVI   | S1 N-Term   | 1     |
| 15                                                     | TMNKSQSVIINNSTNV    | S1 N-Term   | 1     |
| 16                                                     | VIIINNSTNVIRACNF    | S1 N-Term   | 1     |
| 17                                                     | TNVIRACNFELCDNPF    | S1 N-Term   | 1     |
| 18                                                     | NFELCDNPFVAVSKPM    | S1 N-Term   | 1     |
| 19                                                     | NPFVAVSKPMGTQHTMI   | S1 N-Term   | 1     |
| 20                                                     | PMGTQHTMIFDNAF      | S1 N-Term   | 1     |
| 21                                                     | THTMIFDNAFNCTFEYI   | S1 N-Term   | 1     |
| 22                                                     | NAFNCTFEYISDAFSLDV  | S1 N-Term   | 1     |
| 23                                                     | YISDAFSLDVSEKSGNFK  | S1 N-Term   | 1     |
| 24                                                     | DVSEKSGNFKHLREFVFK  | S1 N-Term   | 1     |
| 25                                                     | FKHLREFVFKNKDGFLYV  | S1 N-Term   | 1     |
| 26                                                     | FKNKDGFLYVYKGYQPI   | S1 N-Term   | 1     |
| 27                                                     | LYVYKGYQPIDVVRDL    | S1 N-Term   | 1     |
| 28                                                     | YQPIDVVRDLPSGFNTLK  | S1 N-Term   | 1     |
| 29                                                     | DLPSGFNTLKPIFKLPL   | S1 N-Term   | 1     |
| 30                                                     | TLKPIFKLPLGINITNFR  | S1 N-Term   | 1     |
| 31                                                     | PLGINITNFRAILTAF    | S1 N-Term   | 1     |
| 32                                                     | TNFRAILTAFSPAQDIW   | S1 N-Term   | 1     |
| 33                                                     | TAFSPAQDIWGTSAAYF   | S1 N-Term   | 1     |
| 34                                                     | IWGTSAAYFVGYLK      | S1 N-Term   | 1     |
| 35                                                     | AAAYFVGYLKPTTFMLKY  | S1 N-Term   | 1     |
| 36                                                     | LKPTTFMLKYDENGTI    | S1 N-Term   | 1     |
| 37                                                     | MLKYDENGITITDAVDCSQ | S1 N-Term   | 1     |
| 38                                                     | TITDAVDCSQNPLAELK   | S1 N-Term   | 1     |
| 39                                                     | CSQNPLAELKCSVKSFEI  | S1 N-Term   | 1     |
| 40                                                     | LKCSVKSFEIDKGIY     | S1 N-Term   | 1     |
| 41                                                     | KSFEIDKGIYQTSNFRVY  | S1 N-Term   | 1     |
| 42                                                     | IYQTSNFRVYVPSGDVRF  | RBD         | 1     |
| 43                                                     | VVPSGDVRFPNITNL     | RBD         | 1     |
| 44                                                     | VVRFPNITNLCPFGEVF   | RBD         | 1     |

|    |                     |           |   |
|----|---------------------|-----------|---|
| 45 | TNLCPFGEVFNATKFPSV  | RBD       | 1 |
| 46 | VFNATKFPSVYAWERKKI  | RBD       | 1 |
| 47 | SVYAWERKKISNCVADY   | RBD       | 1 |
| 48 | KKISNCVADYSVLVNSTF  | RBD       | 1 |
| 49 | DYSVLVNSTFFSTFKCY   | RBD       | 1 |
| 50 | STFFSTFKCYGVSATKL   | RBD       | 1 |
| 51 | KCYGVSATKLNDLCFSNV  | RBD       | 1 |
| 52 | KLNDLCFSNVYADSFVVK  | RBD       | 1 |
| 53 | NVYADSFVVKGDDVRQIA  | RBD       | 1 |
| 54 | VKGDDVRQIAPGQGVIA   | RBD       | 1 |
| 55 | IAPGQGVIAADYNYKL    | RBD       | 1 |
| 56 | GVIADYNYKLPDDFMGCV  | RBD       | 1 |
| 57 | KLPDDFMGCVLAWNTRNI  | RBD       | 1 |
| 58 | CVLAWNTRNIDATSTGNY  | RBD       | 1 |
| 59 | NIDATSTGNYNYKYRYLR  | RBD       | 1 |
| 60 | NYNYKYRYLRHGKLRPF   | RBD       | 1 |
| 61 | YLRHGKLRPFERDISNV   | RBD       | 1 |
| 62 | RPFERDISNVFSPDGK    | RBD       | 1 |
| 63 | SNVPFSPDGKCTPPAL    | RBD       | 1 |
| 64 | DGKCTPPALNCYWPL     | RBD       | 1 |
| 65 | PPALNCYWPLNDYGFY    | RBD       | 1 |
| 66 | YWPLNDYGFYTTTGIGY   | RBD       | 1 |
| 67 | GFYTTTGIGYQPYRVVVL  | RBD       | 1 |
| 68 | GYQPYRVVLSFELLNA    | RBD       | 1 |
| 69 | VVLSFELLNAPATVCGPK  | RBD       | 1 |
| 70 | NAPATVCGPKLSTDLIK   | RBD       | 1 |
| 71 | GPKLSTDLIKQCVNFN    | RBD       | 1 |
| 72 | IKNQCVMFNFNGLTGTGV  | RBD       | 1 |
| 73 | NFNGLTGTGVLTPSSKRF  | S1 C-Term | 1 |
| 74 | GVLTPSSKRFQPFQFGR   | S1 C-Term | 1 |
| 75 | RFQPFQFGRDVSD       | S1 C-Term | 1 |
| 76 | QQFGRDVSDFTDSVRDPK  | S1 C-Term | 1 |
| 77 | DFTDSVRDPKTSEILDI   | S1 C-Term | 1 |
| 78 | DPKTSEILDISPCFSGGV  | S1 C-Term | 1 |
| 79 | DISPCFSGGVSVITPGTNA | S1 C-Term | 1 |
| 80 | VSVITPGTNASSEVAVLY  | S1 C-Term | 1 |
| 81 | NASSEVAVLYQDVNCTDV  | S1 C-Term | 1 |
| 82 | LYQDVNCTDVSTAIHA    | S1 C-Term | 1 |
| 83 | CTDVSTAIHADQLTPAWR  | S1 C-Term | 1 |
| 84 | HADQLTPAWRIYSTGNNV  | S1 C-Term | 1 |
| 85 | WRIYSTGNNVFQTQAGCL  | S1 C-Term | 1 |
| 86 | NVFQTQAGCLIGAEHV    | S1 C-Term | 1 |
| 87 | AGCLIGAEHVDTSYECDI  | S1 C-Term | 1 |
| 88 | HVDTSYECDIPIGAGICA  | S1 C-Term | 1 |
| 89 | DIPIGAGICASYHTVSL   | S1 C-Term | 1 |
| 90 | CASYHTVSLLRSTSQKSI  | S1 C-Term | 1 |
| 91 | LLRSTSQKSIVAYTMSL   | S2        | 1 |
| 92 | KSIVAYTMSLGADSSIA   | S2        | 1 |

|    |                    |    |   |
|----|--------------------|----|---|
| 93 | SLGADSSIAYSNNTIAI  | S2 | 1 |
| 94 | IAYSNNTIAIPTNFSISI | S2 | 1 |
| 95 | AIPTNFSISITTEVMPV  | S2 | 1 |
| 96 | ISITTEVMPVSMAKTSV  | S2 | 1 |
| 1  | MPVSMAKTSVDCNMYI   | S2 | 2 |
| 2  | KTSVDCNMYICGDSTECA | S2 | 2 |
| 3  | YICGDSTECANLLQY    | S2 | 2 |
| 4  | TECANLLQYGSFCTQL   | S2 | 2 |
| 5  | LQYGSFCTQLNRALSGIA | S2 | 2 |
| 6  | QLNRALSGIAAEQDRNTR | S2 | 2 |
| 7  | IAAEQDRNTREVFAQVK  | S2 | 2 |
| 8  | NTREVFAQVKQMYKPTPL | S2 | 2 |
| 9  | VKQMYKPTPLKYFGGFNF | S2 | 2 |
| 10 | TLKYFGGFNFSQILPDPL | S2 | 2 |
| 11 | NFSQILPDPLKPTKRSFI | S2 | 2 |
| 12 | PLKPTKRSFIEDLLFNKV | S2 | 2 |
| 13 | FIEDLLFNKVTLADAGFM | S2 | 2 |
| 14 | KVTLADAGFMKQYGECL  | S2 | 2 |
| 15 | GFMKQYGECLGDINARDL | S2 | 2 |
| 16 | CLGDINARDLICAQKF   | S2 | 2 |
| 17 | ARDLICAQKFNGLTVL   | S2 | 2 |
| 18 | AQKFNGLTVLPLLTDDM  | S2 | 2 |
| 19 | VLPLLTDDMIAAYTAAL  | S2 | 2 |
| 20 | DMIAAYTAALVSGTATA  | S2 | 2 |
| 21 | AALVSGTATAGWTFGAGA | S2 | 2 |
| 22 | TAGWTFGAGAALQIPFAM | S2 | 2 |
| 23 | GAALQIPFAMQMAYRF   | S2 | 2 |
| 24 | PFAMQMAYRFNGIGV    | S2 | 2 |
| 25 | MAYRFNGIGVTQNVLY   | S2 | 2 |
| 26 | GIGVTQNVLYENQKQIA  | S2 | 2 |
| 27 | VLYENQKQIANQFNKAI  | S2 | 2 |
| 28 | QIANQFNKAISIQIESL  | S2 | 2 |
| 29 | KAISIQIESLTTTSTAL  | S2 | 2 |
| 30 | ESLTTTSTALGKLQDVV  | S2 | 2 |
| 31 | TALGKLQDVVNQNAQAL  | S2 | 2 |
| 32 | DVVNQNAQALNTLVKQL  | S2 | 2 |
| 33 | QALNTLVKQLSSNFGAI  | S2 | 2 |
| 34 | KQLSSNFGAISSVLNDIL | S2 | 2 |
| 35 | AISSVLNDILSRDKVEA  | S2 | 2 |
| 36 | ILSRDKVEAEVQIDRLI  | S2 | 2 |
| 37 | EAEVQIDRLITGRQLSL  | S2 | 2 |
| 38 | RLITGRQLSLQTYVTQQL | S2 | 2 |
| 39 | SLQTYVTQQLIRAAEIRA | S2 | 2 |
| 40 | QLIRAAEIRASANLAATK | S2 | 2 |
| 41 | RASANLAATKMSECVL   | S2 | 2 |
| 42 | AATKMSECVLQSKRVDF  | S2 | 2 |
| 43 | VLQSKRVDFCGKGYHLM  | S2 | 2 |
| 44 | DFCGKGYHLMSPQAAPH  | S2 | 2 |

|    |                     |    |   |
|----|---------------------|----|---|
| 45 | LMSFPQAAPHGVVFLHV   | S2 | 2 |
| 46 | APHGVVFLHVTVPSQER   | S2 | 2 |
| 47 | HVTVPSQERNFTTAPAI   | S2 | 2 |
| 48 | ERNFTTAPAICHEGKAYF  | S2 | 2 |
| 49 | AICHEGKAYFPREGVVFV  | S2 | 2 |
| 50 | YFPREGVVFVNGTSWFI   | S2 | 2 |
| 51 | FVFNGTSWFITQRNFF    | S2 | 2 |
| 52 | SWFITQRNFFSPQII     | S2 | 2 |
| 53 | QRNFFSPQIITDNTFV    | S2 | 2 |
| 54 | QIITDNTFVSGNCDVVI   | S2 | 2 |
| 55 | FVSGNCDVVIINNTVY    | S2 | 2 |
| 56 | VIGIINNTVYDPLQPEL   | S2 | 2 |
| 57 | TVYDPLQPELDSFKEEL   | S2 | 2 |
| 58 | PELDSFKEELDKYFKNH   | S2 | 2 |
| 59 | EELDKYFKNHTSPDVL    | S2 | 2 |
| 60 | KNHTSPDVLGDISGINA   | S2 | 2 |
| 61 | DLGDISGINASVNIQK    | S2 | 2 |
| 62 | INASVNIQKEIDRLNEV   | S2 | 2 |
| 63 | QKEIDRLNEVAKNLNESL  | S2 | 2 |
| 64 | EVAKNLNESLIDLQELGK  | S2 | 2 |
| 65 | SLIDLQELGKYEQYIKW   | S2 | 2 |
| 66 | LGKYEQYIKWPWYVWLGF  | S2 | 2 |
| 67 | KWPWYVWLGFIAGLIAIV  | S2 | 2 |
| 68 | GFIAGLIAIVMTILL     | S2 | 2 |
| 69 | IAIVMTILLCCMTSCCSCS | S2 | 2 |
| 70 | CCMTSCCSCCLKGACSCGS | S2 | 2 |
| 71 | CLKGACSCGSCCKFDEDD  | S2 | 2 |
| 72 | GSCCKFDEDDSEPVKGV   | S2 | 2 |
| 73 | DDSEPVKGVKLHYT      | S2 | 2 |

| SARS-Related Coronavirus 2 Nucleocapsid (N) Protein Peptide Array, Catalog No. NR-52404 |                     |             |       |
|-----------------------------------------------------------------------------------------|---------------------|-------------|-------|
| Peptide                                                                                 | Amino acid sequence | Domain pool | Plate |
| 1                                                                                       | MSDNGPQNQRNAPRITF   | NC N-Term   | 3     |
| 2                                                                                       | NQRNAPRITFGGPSDST   | NC N-Term   | 3     |
| 3                                                                                       | ITFGGPSDSTGSNQNGE   | NC N-Term   | 3     |
| 4                                                                                       | DSTGSNQNGERSGARSK   | NC N-Term   | 3     |
| 5                                                                                       | NGERSGARSKQRRPQGL   | NC N-Term   | 3     |
| 6                                                                                       | RSKQRRPQGLPNNTASW   | NC RNA BD   | 3     |
| 7                                                                                       | QGLPNNTASWFTALTQH   | NC RNA BD   | 3     |
| 8                                                                                       | ASWFTALTQHGKEDLKF   | NC RNA BD   | 3     |
| 9                                                                                       | TQHGKEDLKFPRGQGV    | NC RNA BD   | 3     |
| 10                                                                                      | LKFPRGQGVPIINTSSP   | NC RNA BD   | 3     |
| 11                                                                                      | GVPINTSSPDDQIGYY    | NC RNA BD   | 3     |
| 12                                                                                      | SSPDDQIGYYRRATRRRI  | NC RNA BD   | 3     |
| 13                                                                                      | GYRRATRRIRGGDGKM    | NC RNA BD   | 3     |
| 14                                                                                      | RRIRGGDGKMKDLSPRW   | NC RNA BD   | 3     |

|    |                     |                 |   |
|----|---------------------|-----------------|---|
| 15 | GKMKDLSRWYFYLLGT    | NC RNA BD       | 3 |
| 16 | PRWYFYLLGTGPEAGLP   | NC RNA BD       | 3 |
| 17 | LGTGPEAGLPYGANKDG   | NC RNA BD       | 3 |
| 18 | GLPYGANKDGIWVATE    | NC RNA BD       | 3 |
| 19 | KDGIWVATEGALNTPK    | NC RNA BD       | 3 |
| 20 | ATEGALNTPKDHIHIGTRN | NC RNA BD       | 3 |
| 21 | TPKDHIGTRNPANNAI    | NC RNA BD       | 3 |
| 22 | TRNPANNAIWLQLPQG    | NC RNA BD       | 3 |
| 23 | AAIVLQLPQGTTLPKGF   | NC RNA BD       | 3 |
| 24 | PQGTTLPKGFYAEGSRG   | NC RNA BD       | 3 |
| 25 | KGFYAEGSRGGSQASSR   | NC RNA BD       | 3 |
| 26 | SRGGSQASSRSSRSRN    | NC3             | 3 |
| 27 | SSRSSRSRNSSRNSTP    | NC3             | 3 |
| 28 | SRNSSRNSTPGSSRGTS   | NC3             | 3 |
| 29 | STPGSSRGTSPTARMAGN  | NC3             | 3 |
| 30 | GTSPARMAGNGGDAALA   | NC3             | 3 |
| 31 | AGNGGDAALALLLDRL    | NC3             | 3 |
| 32 | ALALLLDRLNQLSKM     | NC3             | 3 |
| 33 | DRLNQLSKMMSGKGGQQ   | NC3             | 3 |
| 34 | SKMSGKGGQQGQTVTK    | NC3             | 3 |
| 35 | QQQQGQTVTKSAAEAS    | NC3             | 3 |
| 36 | VTKKSAAEASKPRQKR    | NC3             | 3 |
| 37 | EASKKPRQKRTATKAYN   | NC dimerization | 3 |
| 38 | KKRTATKAYNVTQAFGR   | NC dimerization | 3 |
| 39 | AYNVTQAFGRGPEQTQ    | NC dimerization | 3 |
| 40 | FGRRGPEQTQGNFGDQE   | NC dimerization | 3 |
| 41 | QTQGNFGDQELIRQGT    | NC dimerization | 3 |
| 42 | DQELIRQGTQYKHWPQI   | NC dimerization | 3 |
| 43 | GTDYKHWPQIAQFAPSA   | NC dimerization | 3 |
| 44 | PQIAQFAPSASAFFGMS   | NC dimerization | 3 |
| 45 | PSASAFFGMSRIGMEVT   | NC dimerization | 3 |
| 46 | GMSRIGMEVTPSGTWLT   | NC dimerization | 3 |
| 47 | EVTSGTWLTYTGAIKL    | NC dimerization | 3 |
| 48 | WLTYTGAIKLDDKDPNF   | NC dimerization | 3 |
| 49 | IKLDDKDPNFKDQVILL   | NC dimerization | 3 |
| 50 | PNFKDQVILLNKHIDAY   | NC dimerization | 3 |
| 51 | ILLNKHIDAYKTFPPE    | NC dimerization | 3 |
| 52 | DAYKTFPPEPKKDKKK    | NC C-Term       | 3 |
| 53 | PTEPKKDKKKKADETQA   | NC C-Term       | 3 |
| 54 | KKKKADETQALPQRQKK   | NC C-Term       | 3 |
| 55 | TQALPQRQKKQQTVLL    | NC C-Term       | 3 |
| 56 | QKKQQTVLLPAADLDD    | NC C-Term       | 3 |
| 57 | TLLPAADLDDFSKQLQQ   | NC C-Term       | 3 |
| 58 | LDDFSKQLQQSMSSADS   | NC C-Term       | 3 |
| 59 | LQQSMSSADSTQA       | NC C-Term       | 3 |

| SARS-Related Coronavirus 2 Envelope (E) Protein Peptide Array, Catalog No. NR-52405 |                     |             |           |
|-------------------------------------------------------------------------------------|---------------------|-------------|-----------|
| Peptide                                                                             | Amino acid sequence | Domain pool | Well pool |
| 1                                                                                   | MYSFVSEETGLIVNSV    | Env         | 4         |
| 2                                                                                   | ETGTLIVNSVLLFLAFV   | Env         | 4         |
| 3                                                                                   | NSVLLFLAFVFLVTL     | Env         | 4         |
| 4                                                                                   | AFVFLVTLAILTALR     | Env         | 4         |
| 5                                                                                   | VTLAILTALRLCAYCCN   | Env         | 4         |
| 6                                                                                   | ALRLCAYCCNIVNSLV    | Env         | 4         |
| 7                                                                                   | CCNIVNSLVKPSFYVY    | Env         | 4         |
| 8                                                                                   | SLVKPSFYVYSRVKLN    | Env         | 4         |
| 9                                                                                   | YVYSRVKLNSSRPDL     | Env         | 4         |
| 10                                                                                  | NLNSSRVPDLLV        | Env         | 4         |

| SARS-Related Coronavirus 2 Membrane (M) Protein Peptide Array, Catalog No. NR-52403 |                     |             |           |
|-------------------------------------------------------------------------------------|---------------------|-------------|-----------|
| Peptide                                                                             | Amino acid sequence | Domain pool | Well pool |
| 1                                                                                   | MADSNGTITVEELKLL    | Membrane    | 5         |
| 2                                                                                   | ITVEELKLLQWNLVI     | Membrane    | 5         |
| 3                                                                                   | KLLEQWNLVIGFLFTW    | Membrane    | 5         |
| 4                                                                                   | LVIGFLFTWICLLQFA    | Membrane    | 5         |
| 5                                                                                   | LTWICLLQFAYANRNF    | Membrane    | 5         |
| 6                                                                                   | QFAYANRNRFLYIKLI    | Membrane    | 5         |
| 7                                                                                   | NRFLYIKLIFLWLLWP    | Membrane    | 5         |
| 8                                                                                   | KLIFLWLLWPVTLACFV   | Membrane    | 5         |
| 9                                                                                   | LWPVTLACFVLAAYVRI   | Membrane    | 5         |
| 10                                                                                  | CFVLAAYVRINWITGGI   | Membrane    | 5         |
| 11                                                                                  | YRINWITGGIAMIACL    | Membrane    | 5         |
| 12                                                                                  | GGIAMIACLVGLMWLS    | Membrane    | 5         |
| 13                                                                                  | ACLVGLMWLSYFIASFR   | Membrane    | 5         |
| 14                                                                                  | WLSYFIASFRFARTRS    | Membrane    | 5         |
| 15                                                                                  | SFRLFARTRSMWSFNPE   | Membrane    | 5         |
| 16                                                                                  | TRSMWSFNPETNILLNV   | Membrane    | 5         |
| 17                                                                                  | NPETNILLNVPLHGTL    | Membrane    | 5         |
| 18                                                                                  | LNVPPLHGTLRPLLES    | Membrane    | 5         |
| 19                                                                                  | TILRPLLESELVIGAV    | Membrane    | 5         |
| 20                                                                                  | LESELVIGAVILRGHLR   | Membrane    | 5         |
| 21                                                                                  | GAVILRGHLRIAGHHLG   | Membrane    | 5         |
| 22                                                                                  | HLRIAGHHLGRCDIKDL   | Membrane    | 5         |
| 23                                                                                  | HLGRCDIKDLPKEITVA   | Membrane    | 5         |
| 24                                                                                  | KDLPKEITVATSRTLSTY  | Membrane    | 5         |
| 25                                                                                  | TVATSRTLSTYKLGASQ   | Membrane    | 5         |
| 26                                                                                  | LSYKLGASQRVAGDSG    | Membrane    | 5         |
| 27                                                                                  | ASQRVAGDSGFAAYSRY   | Membrane    | 5         |
| 28                                                                                  | DSGFAAYSRYRIGNYKL   | Membrane    | 5         |
| 29                                                                                  | SRYRIGNYKLNTHSSS    | Membrane    | 5         |
| 30                                                                                  | YKLNTHSSSSDNIALL    | Membrane    | 5         |

|    |              |          |   |
|----|--------------|----------|---|
| 31 | SSSSDNIALLVQ | Membrane | 5 |
|----|--------------|----------|---|

Supplemental Table 1: Amino acid sequence information for the peptide libraries used in screens. Yellow highlights are the multi-mers that contain the identified CD8 T cell epitopes and the green highlights are the multi-mers that contain the identified CD4 T cell epitopes.
